# Supplementary material
Source: PubMed Central journal article supplement (PMC8103881)
Supplement: 13428_2021_1588_MOESM1_ESM.pdf [file 13428_2021_1588_MOESM1_ESM.pdf]

## Appendix A: Study Details

| SN | Launched | Finished | N    | Reward | % New | % Female | Age   | % White | % Rep | CRT right | % Mobile |
|----|----------|----------|------|--------|-------|----------|-------|---------|-------|-----------|----------|
| 1  | 2/25/20  | 2/25/20  | 103  | \$1.50 | 0.32  | 0.39     | 35.31 | .       | .     | .         | 0.01     |
| 2  | 3/10/20  | 3/12/20  | 1050 | \$2.25 | 0.19  | 0.45     | 37.07 | 0.77    | 0.45  | 1.59      | 0.02     |
| 3  | 3/14/20  | 3/14/20  | 998  | \$2.00 | 0.28  | 0.43     | 38.53 | .       | 0.46  | 1.55      | 0.04     |
| 4  | 3/16/20  | 3/17/20  | 845  | \$1.50 | 0.38  | 0.38     | 36.39 | 0.73    | 0.44  | 1.57      | 0.04     |
| 5  | 3/16/20  | 3/16/20  | 1207 | \$1.05 | 0.31  | 0.40     | 36.54 | .       | 0.46  | 1.49      | 0.03     |
| 6  | 3/20/20  | 3/21/20  | 105  | \$1.50 | 0.97  | 0.33     | 35.25 | .       | .     | .         | 0.01     |
| 7  | 3/24/20  | 3/24/20  | 197  | \$0.75 | 0.33  | 0.36     | 34.14 | 0.74    | .     | .         | 0.01     |
| 8  | 4/16/20  | 4/16/20  | 203  | \$1.35 | 1.04  | 0.35     | 35.93 | 0.71    | 0.53  | 1.11      | 0.00     |
| 9  | 4/17/20  | 4/17/20  | 754  | \$1.05 | 0.92  | 0.37     | 35.83 | 0.67    | 0.49  | 1.34      | 0.04     |
| 10 | 4/22/20  | 4/22/20  | 753  | \$1.05 | 1.16  | 0.36     | 37.46 | 0.66    | 0.54  | 1.05      | 0.02     |
| 11 | 4/23/20  | 4/23/20  | 758  | \$1.05 | 0.85  | 0.45     | 37.64 | 0.73    | 0.49  | .         | 0.07     |
| 12 | 4/30/20  | 4/30/20  | 1793 | \$0.60 | 0.93  | 0.52     | 38.62 | 0.71    | 0.45  | .         | 0.05     |
| 13 | 5/2/20   | 5/2/20   | 307  | \$0.45 | 0.63  | 0.38     | 37.98 | 0.66    | .     | 1.49      | 0.05     |
| 14 | 5/8/20   | 5/8/20   | 107  | \$2.25 | 0.76  | .        | .     | 0.68    | .     | .         | 0.01     |
| 15 | 5/8/20   | 5/14/20  | 1072 | \$2.40 | 1.44  | .        | 35.76 | 0.69    | 0.46  | 0.99      | 0.02     |
| 16 | 6/9/20   | 6/9/20   | 97   | \$1.05 | 1.54  | 0.36     | 39.69 | .       | .     | .         | 0.02     |
| 17 | 6/15/20  | 6/15/20  | 996  | \$0.20 | 0.91  | .        | .     | .       | .     | .         | 0.05     |
| 18 | 6/22/20  | 6/22/20  | 496  | \$0.30 | 1.63  | 0.35     | 36.23 | 0.69    | 0.57  | .         | 0.00     |
| 19 | 6/22/20  | 6/26/20  | 986  | \$2.40 | 1.76  | .        | 36.88 | 0.61    | 0.51  | 0.67      | 0.01     |
| 20 | 7/17/20  | 7/17/20  | 327  | \$2.25 | 1.44  | 0.24     | 36.72 | 0.53    | 0.65  | 0.91      | 0.00     |
| 21 | 7/18/20  | 7/19/20  | 1507 | \$2.25 | 1.24  | 0.40     | 38.13 | 0.68    | 0.51  | 1.18      | 0.00     |
| 22 | 7/28/20  | 7/29/20  | 285  | \$0.90 | 1.04  | .        | .     | 0.82    | .     | .         | 0.01     |
| 23 | 7/31/20  | 7/31/20  | 593  | \$1.50 | 1.43  | .        | .     | .       | .     | .         | 0.01     |

**Table S1.** Study details by: date when the studies were launched and finished; reward paid; sample size; fraction of participants without prior experience before 2/24/2020; fraction of female participants; mean age; fraction of participants self-identified as white; fraction of participants leaning towards the Republican party; number of correct answers in the Cognitive Reflective Test (out of three); fraction of participants using a mobile device to respond to the survey.

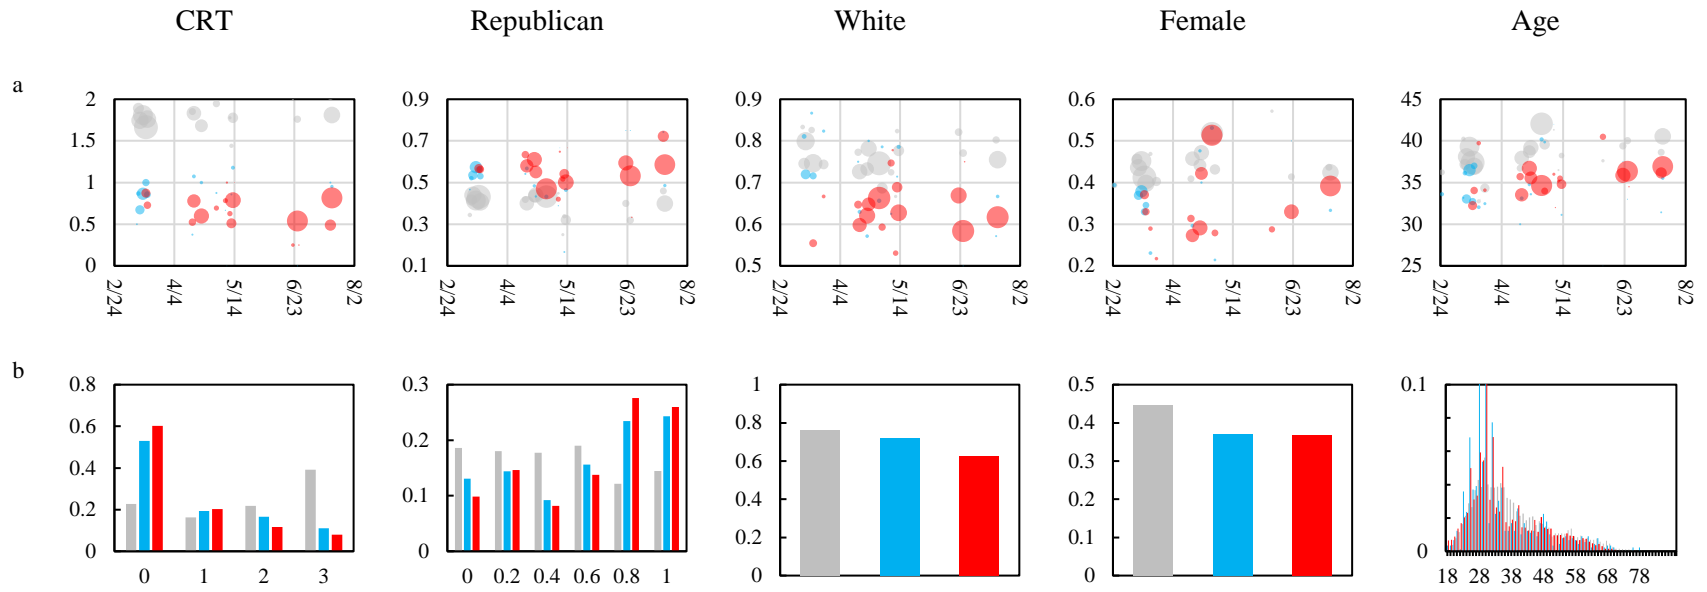

**Figure S1.** Distribution of variables by type (gray=baseline; blue=unrestricted pre-quarantine; red=unrestricted post-quarantine) a) over time and b) overall.

## Appendix B: Robustness checks

|                  | CRT                  | R                    | W                    | F                   | A                    |
|------------------|----------------------|----------------------|----------------------|---------------------|----------------------|
| baseline         | 0.913***<br>(0.026)  | -0.429***<br>(0.023) | 0.278***<br>(0.024)  | 0.155***<br>(0.025) | 0.339***<br>(0.025)  |
| pre-             | 0.242***<br>(0.069)  | -0.104<br>(0.065)    | 0.193*<br>(0.074)    | -0.076<br>(0.063)   | 0.026<br>(0.061)     |
| time trend       | 0.000<br>(0.000)     | 0.000<br>(0.000)     | 0.000<br>(0.000)     | 0.000<br>(0.000)    | 0.002***<br>(0.000)  |
| Constant         | -0.453***<br>(0.027) | 0.175***<br>(0.027)  | -0.133***<br>(0.029) | -0.074**<br>(0.028) | -0.323***<br>(0.027) |
| R <sup>2</sup>   | 0.195                | 0.047                | 0.018                | 0.007               | 0.026                |
| N                | 7,643                | 10,440               | 10,085               | 9,146               | 10,454               |
| p (baseline=pre) | <0.001               | <0.001               | 0.250                | <0.001              | <0.001               |

**Table S2.** Standardized variables. Include a linear time trend as control. <0.05 \*;<0.01 \*\*;<0.001 \*\*\*

|                | <i>Baseline</i>     |                    |                     |                   |                     | <i>Pre-Quarantine</i> |                   |                   |                   |                   |
|----------------|---------------------|--------------------|---------------------|-------------------|---------------------|-----------------------|-------------------|-------------------|-------------------|-------------------|
|                | CRT                 | R                  | W                   | F                 | A                   | CRT                   | R                 | W                 | F                 | A                 |
| 3/16           | -0.087**<br>(0.032) | 0.015<br>(0.032)   | -0.116**<br>(0.039) | -0.027<br>(0.031) | -0.073*<br>(0.031)  | 0.134<br>(0.086)      | -0.079<br>(0.080) | 0.007<br>(0.106)  | -0.138<br>(0.075) | -0.071<br>(0.073) |
| time trend     | 0.001**<br>(0.000)  | -0.001*<br>(0.000) | 0.001*<br>(0.000)   | 0.000<br>(0.000)  | 0.002***<br>(0.000) | 0.000<br>(0.002)      | -0.001<br>(0.002) | -0.001<br>(0.002) | 0.000<br>(0.001)  | 0.001<br>(0.001)  |
| Constant       | 0.013<br>(0.029)    | 0.030<br>(0.030)   | 0.047<br>(0.035)    | -0.003<br>(0.029) | -0.063*<br>(0.028)  | -0.056<br>(0.056)     | 0.072<br>(0.056)  | 0.024<br>(0.076)  | 0.060<br>(0.058)  | -0.013<br>(0.057) |
| R <sup>2</sup> | 0.002               | 0.001              | 0.002               | <0.001            | 0.007               | 0.005                 | 0.004             | 0.001             | 0.005             | 0.001             |
| N              | 4,977               | 6,310              | 5,162               | 6,388             | 6,602               | 790                   | 827               | 506               | 876               | 892               |

**Table S3.** Standardized variables. Include a linear time trend as control. <0.05 \*;<0.01 \*\*;<0.001 \*\*\*

|            | All       | Excl. 1   | Excl. 2   | Excl. 3   | Excl. 4   | Excl. 5   | Excl. 1-3, 5 |
|------------|-----------|-----------|-----------|-----------|-----------|-----------|--------------|
| <i>CRT</i> |           |           |           |           |           |           |              |
| base       | 0.913***  | 0.918***  | 0.929***  | 0.925***  | -         | 0.837***  | 0.860***     |
| pre-       | 0.242***  | 0.220**   | 0.277***  | 0.243***  | -         | 0.209**   | 0.249**      |
| N          | 7,643     | 7,191     | 6,208     | 7,495     | -         | 5,564     | 4,220        |
| <i>R</i>   |           |           |           |           |           |           |              |
| base       | -0.429*** | -0.442*** | -0.418*** | -0.441*** | -0.472*** | -0.446*** | -0.470***    |
| pre-       | -0.104    | -0.107    | -0.106    | -0.116    | -0.265    | -0.129    | -0.222*      |
| N          | 10,440    | 9,874     | 8,480     | 10,155    | 753       | 5,411     | 4,124        |
| <i>W</i>   |           |           |           |           |           |           |              |
| base       | 0.278***  | 0.294***  | 0.293***  | 0.284***  | 0.175     | 0.280***  | 0.296***     |
| pre-       | 0.193*    | 0.203*    | 0.152     | 0.186*    | 0.125     | 0.212*    | 0.226        |
| N          | 10,085    | 9,534     | 8,209     | 9,822     | 892       | 4,574     | 3,480        |
| <i>F</i>   |           |           |           |           |           |           |              |
| base       | 0.155***  | 0.134***  | 0.168***  | 0.160***  | 0.178     | 0.199***  | 0.165***     |
| pre-       | -0.086    | -0.108    | -0.075    | -0.064    | -0.064    | 0.052     | -0.016       |
| N          | 9,146     | 8,713     | 7,400     | 8,866     | 820       | 4,262     | 3,262        |
| <i>A</i>   |           |           |           |           |           |           |              |
| base       | 0.339***  | 0.338***  | 0.415***  | 0.339***  | 0.258**   | 0.317***  | 0.374***     |
| pre-       | 0.026     | 0.056     | 0.111     | 0.017     | 0.288     | 0.083     | 0.210        |
| N          | 10,454    | 9,890     | 8,456     | 10,163    | 783       | 5,069     | 3,842        |

**Table S4.** Standardized variables. Include a linear time trend as control. <0.05 \*;<0.01 \*\*;<0.001 \*\*\*

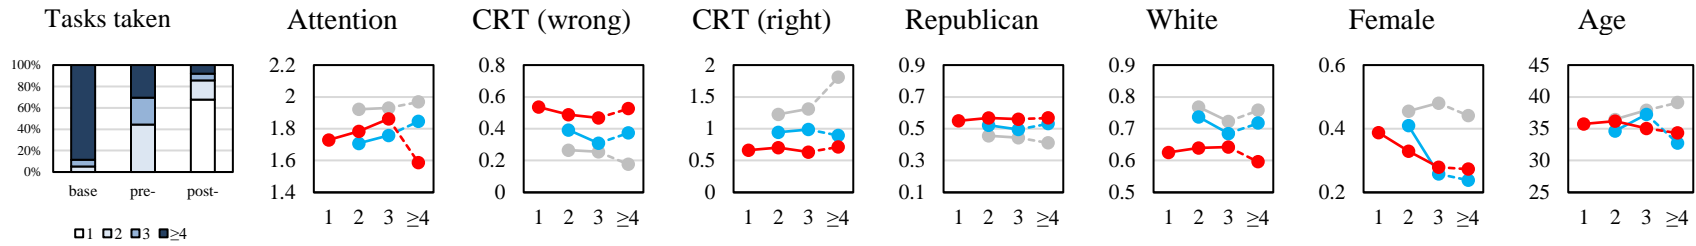

**Figure S2.** Distribution of experience (i.e. study number in our account as proxy) by participant's type during the pandemic, and the corresponding mean values of the key variables reported, by type (gray=baseline; blue= pre-; red= post-) and experience.

|                  | <i>Excluding data before 3/16</i> |                      |                      |                     |                      | <i>Including data before 3/16</i> |                      |                      |                     |                      |
|------------------|-----------------------------------|----------------------|----------------------|---------------------|----------------------|-----------------------------------|----------------------|----------------------|---------------------|----------------------|
|                  | CRT                               | R                    | W                    | F                   | A                    | CRT                               | R                    | W                    | F                   | A                    |
| baseline         | 0.523***<br>(0.052)               | -0.368***<br>(0.048) | 0.267***<br>(0.050)  | 0.368***<br>(0.050) | 0.294***<br>(0.046)  | 0.498***<br>(0.048)               | -0.323***<br>(0.046) | 0.271***<br>(0.048)  | 0.333***<br>(0.047) | 0.278***<br>(0.043)  |
| pre-             | 0.211**<br>(0.074)                | -0.136<br>(0.072)    | 0.209*<br>(0.081)    | 0.065<br>(0.071)    | 0.088<br>(0.067)     | 0.139**<br>(0.046)                | -0.039<br>(0.050)    | 0.205**<br>(0.062)   | 0.065<br>(0.050)    | 0.095<br>(0.049)     |
| time trend       | 0.000<br>(0.000)                  | 0.000<br>(0.000)     | 0.000<br>(0.000)     | 0.000<br>(0.000)    | 0.002***<br>(0.000)  | 0.000<br>(0.000)                  | 0.000<br>(0.000)     | 0.000<br>(0.000)     | 0.000<br>(0.000)    | 0.002***<br>(0.000)  |
| first task       | 0.312***<br>(0.068)               | -0.234***<br>(0.065) | 0.138*<br>(0.066)    | 0.141*<br>(0.067)   | 0.392***<br>(0.063)  | 0.267***<br>(0.063)               | -0.212**<br>(0.062)  | 0.120<br>(0.063)     | 0.096<br>(0.064)    | 0.360***<br>(0.060)  |
| second task      | 0.333***<br>(0.069)               | -0.172**<br>(0.064)  | 0.171**<br>(0.064)   | 0.011<br>(0.066)    | 0.352***<br>(0.062)  | 0.325***<br>(0.064)               | -0.178**<br>(0.061)  | 0.164**<br>(0.061)   | -0.043<br>(0.063)   | 0.335***<br>(0.060)  |
| third task       | 0.314***<br>(0.071)               | -0.204**<br>(0.064)  | 0.123<br>(0.065)     | -0.071<br>(0.068)   | 0.347***<br>(0.064)  | 0.289***<br>(0.065)               | -0.219***<br>(0.060) | 0.097<br>(0.062)     | -0.112<br>(0.064)   | 0.297***<br>(0.061)  |
| log(task>3)      | 0.637***<br>(0.056)               | -0.257***<br>(0.049) | 0.137**<br>(0.050)   | -0.105*<br>(0.052)  | 0.387***<br>(0.051)  | 0.628***<br>(0.052)               | -0.283***<br>(0.047) | 0.126**<br>(0.048)   | -0.107*<br>(0.051)  | 0.384***<br>(0.050)  |
| Constant         | -0.741***<br>(0.073)              | 0.395***<br>(0.071)  | -0.277***<br>(0.073) | -0.191**<br>(0.073) | -0.709***<br>(0.069) | -0.758***<br>(0.069)              | 0.408***<br>(0.068)  | -0.265***<br>(0.070) | -0.151*<br>(0.070)  | -0.674***<br>(0.066) |
| R <sup>2</sup>   | 0.221                             | 0.051                | 0.020                | 0.010               | 0.036                | 0.224                             | 0.052                | 0.021                | 0.009               | 0.034                |
| N                | 7,396                             | 10,179               | 9,812                | 8,894               | 10,177               | 9,279                             | 12,070               | 10,758               | 10,862              | 12,158               |
| p (baseline=pre) | <0.001                            | 0.001                | 0.464                | <0.001              | 0.002                | <0.001                            | <0.001               | 0.319                | <0.001              | 0.001                |

**Table S5.** Standardized variables. Include a linear time trend as control. <0.05 \*;<0.01 \*\*;<0.001 \*\*\*

## **Appendix C: Follow-up study**

### *Methods*

The aim of this follow-up was to test the consistency of participants' responses over time in a succinct way. Thus, we first granted an MTurk qualification to all workers in the aggregated dataset with records for the Cognitive Reflective Test (CRT). Between 6/15/2020 and 6/21/2020, we used that qualification to screen and recruit participants for a 1-minute study. A total of 744 participants took part. As per the classifications reported in the main text of this document, 469 participants were baseline, 33 pre- and 242 post-quarantine.

We surveyed the following six items, all on one screen: age, gender, identity with a political party, ethnicity, an estimate for the overall number of studies taken on MTurk, and an attention check ("dog is to puppy as cat is to \_\_\_"). For the question on identity, participants could see either a 6-point Likert scale with values starting with "Strongly Democrat" (1) and finishing with "Strongly Republican" (6), or the same scale but in reverse order. The order in which all questions appeared was randomized, as well as the options available for gender (male, female, or other) and ethnicity (White / Caucasian, Black, American Indian or Alaska Native, Asian, Native Hawaiian or Pacific Islander, Hispanic / Latino, Multicultural; allowing for more than one choice). To retrieve information on the device participants used, we relied on Qualtrics metadata.

To measure the level of discrepancy between values reported in the aggregated dataset and in this follow-up survey, we subtracted the difference between them. If the difference was equal to zero, then the participant's response was qualified as consistent, and assigned a value of 1 in an auxiliary dummy variable (with 0 otherwise), with an exemption for age where a difference of 1 was treated as a missing value as it is plausible that some of the participants' birthdays occurred between studies. For political preference, participants were treated as either Democrat (if responses were "3" at most) or Republican (if responses were at least "4"). The aggregated dataset had some studies on a 7-point Likert scale. We excluded participants who selected the mid-point in such cases. Finally, the self-reported number of studies taken on MTurk was larger for baseline workers than for unrestricted workers ( $p < 0.001$ ), which further suggests that our methodology for classifying participants based on experience within our account is appropriate.
